# Supplementary material
Source: PubMed Central journal article supplement (PMC3126301)

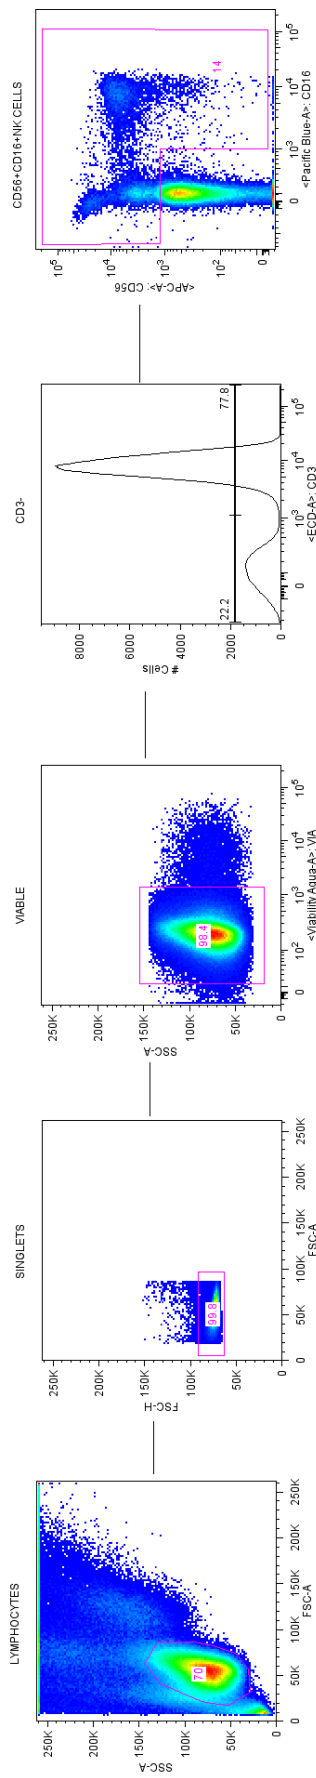

BOOLEAN GATING

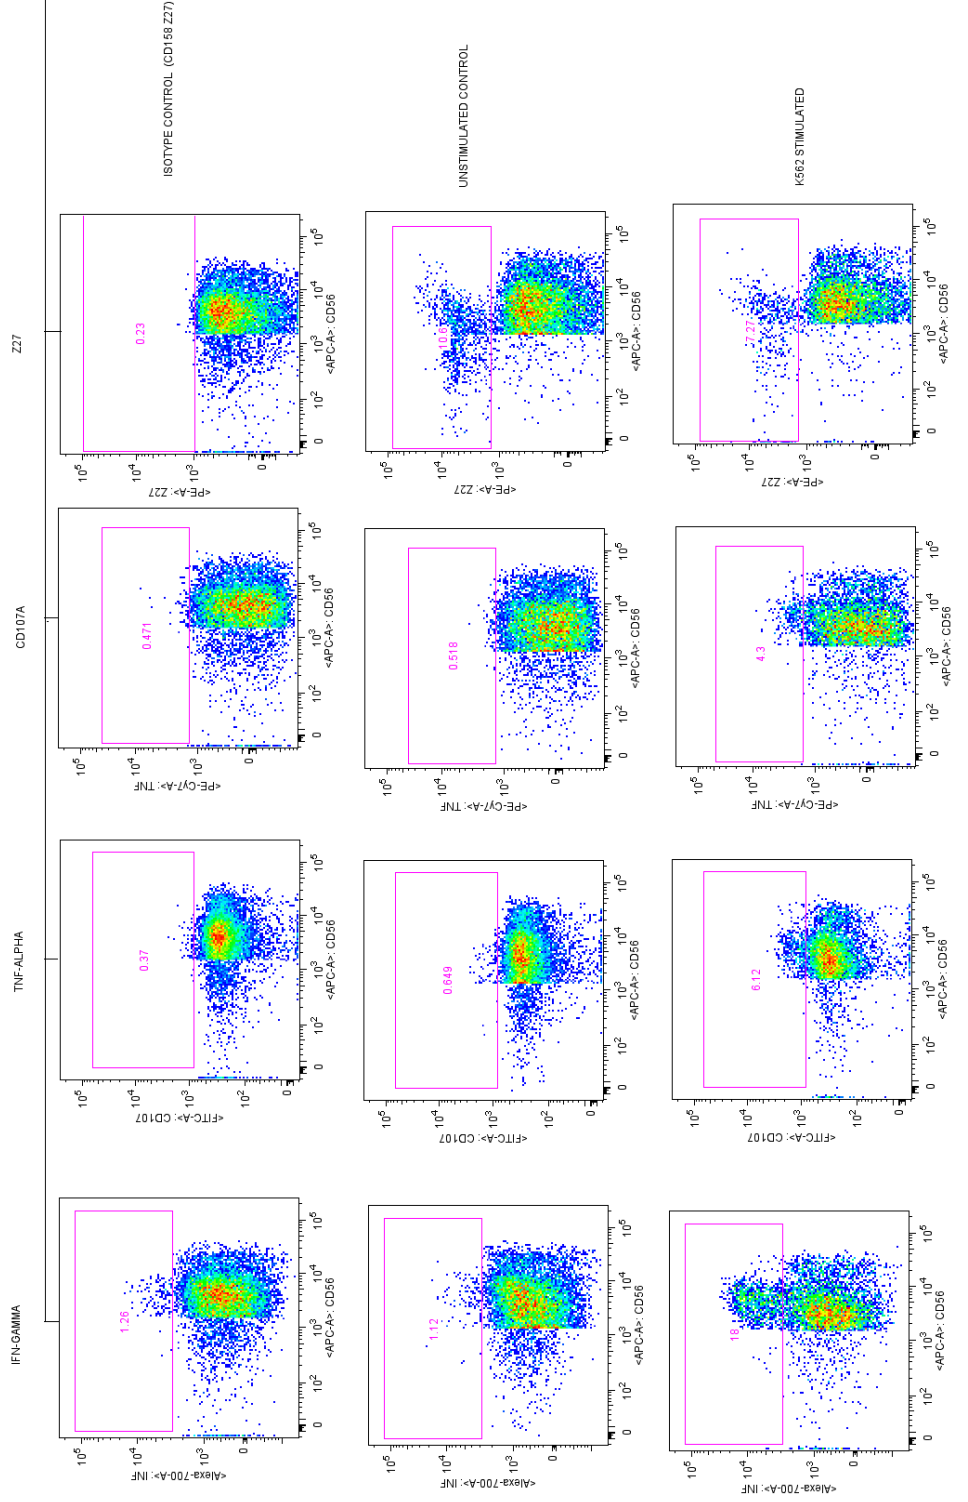

Supplement: supp_85_12_5949__1.pdf [file supp_85_12_5949__1.pdf]

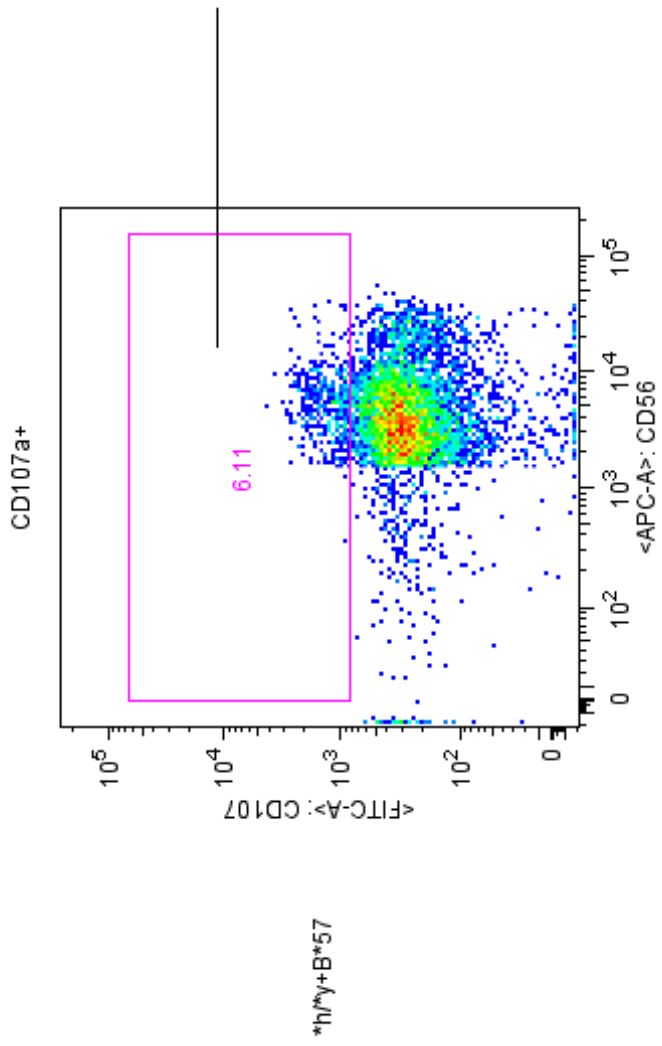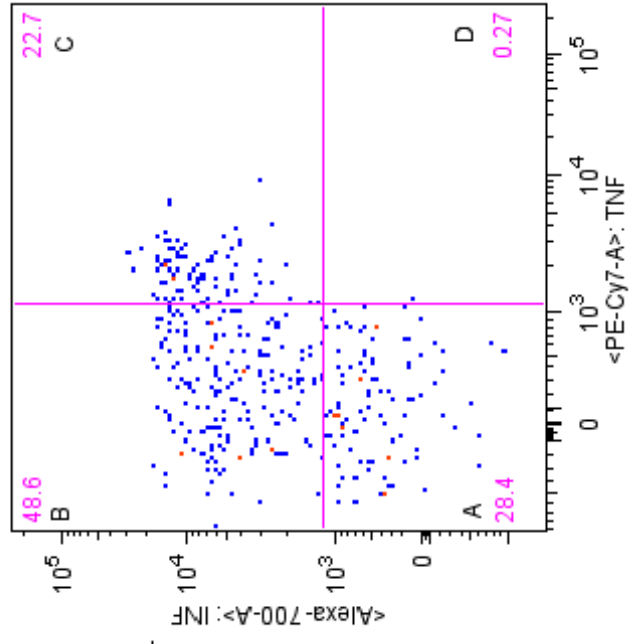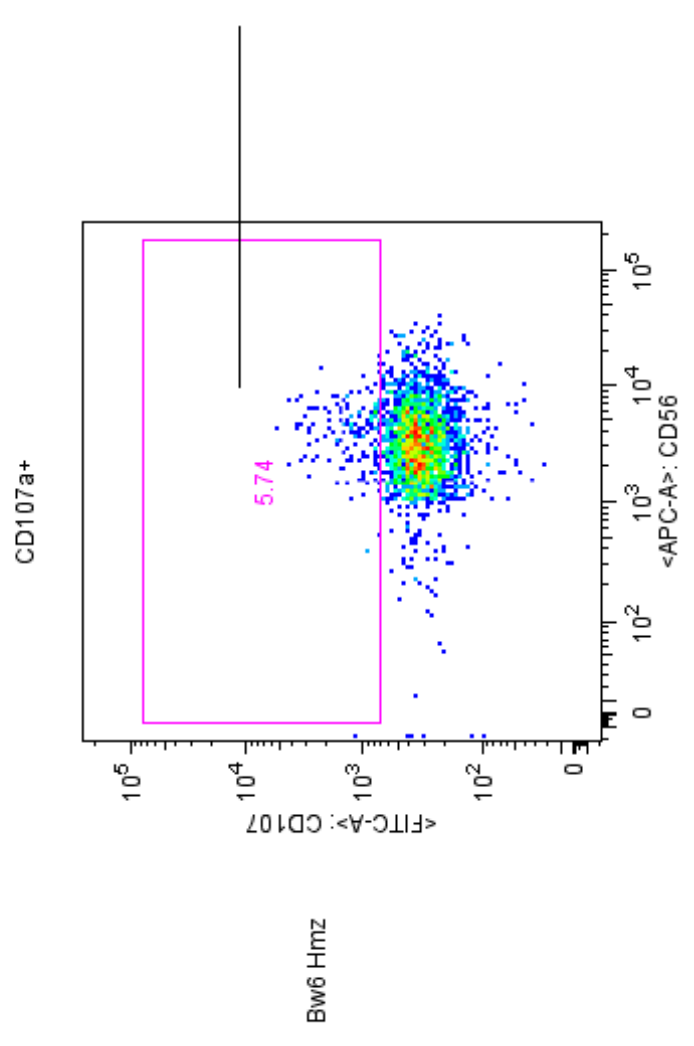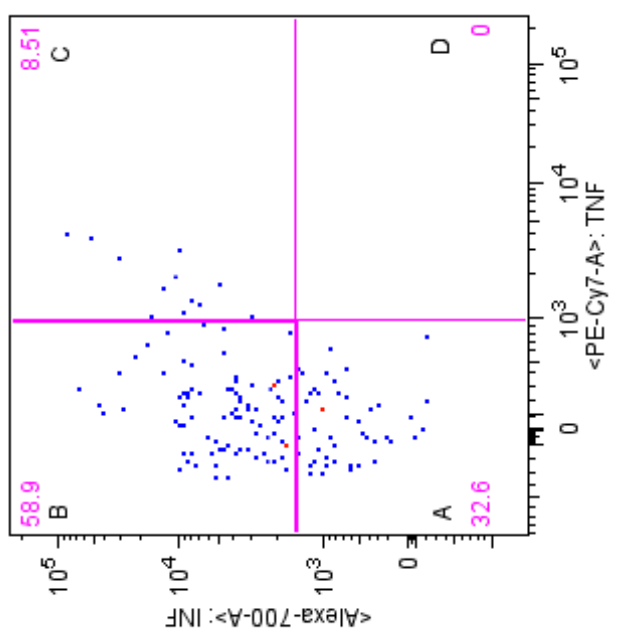

Supplement: supp_85_12_5949__2.pdf [file supp_85_12_5949__2.pdf]

# Supplementary Figure 3

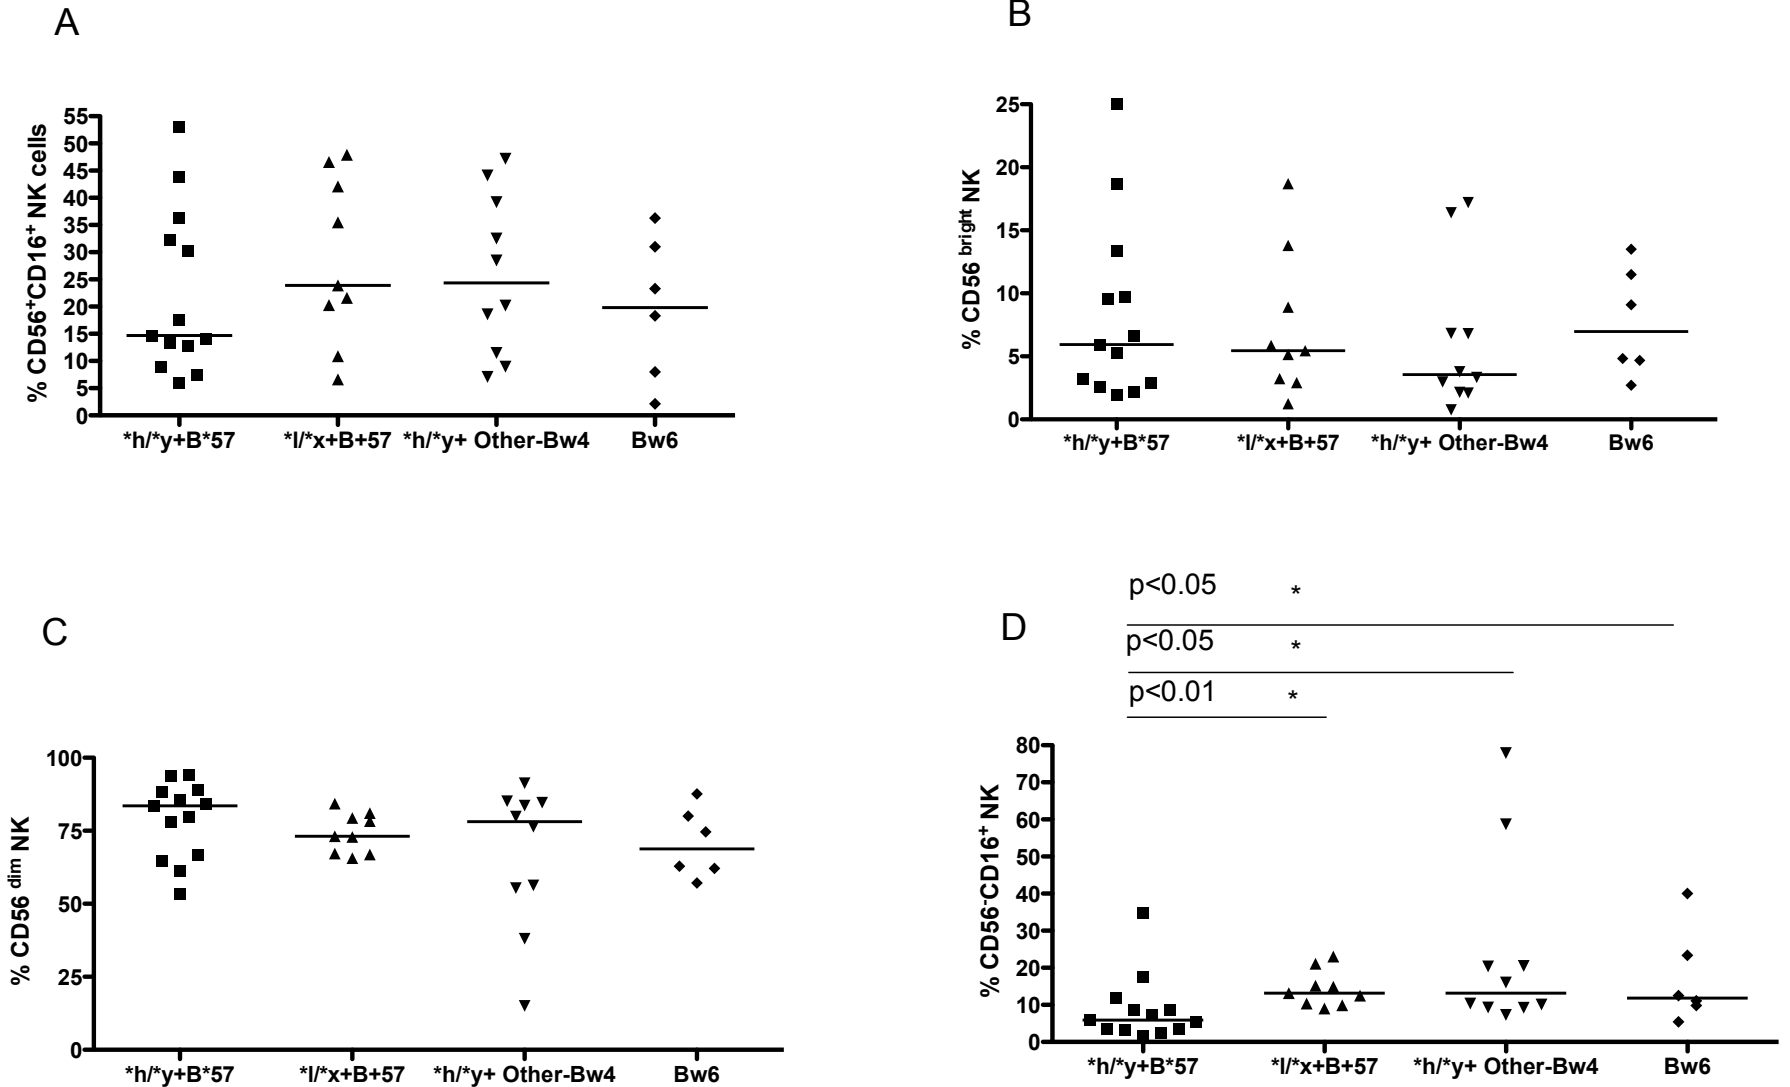

Supplement: supp_85_12_5949__3.pdf [file supp_85_12_5949__3.pdf]
